# Supplementary material
Source: PubMed Central journal article supplement (PMC4844025)

**Supplementary Table 1.** Age-adjusted rates of gastroesophageal reflux, Barrett’s esophagus and esophageal cancer per 100,000 endoscopies, restricted to diagnosis with concurrent endoscopy, Cerner Health Facts® Database, 2001–2010.

|                  | Endoscopies<br>N | Endoscopies/<br>100,000 encounters |                      | GERD diagnosis*/<br>100,000 endoscopies |                            | BE diagnosis*/<br>100,000 endoscopies |                         | EC diagnosis*/<br>100,000 endoscopies |                      |
|------------------|------------------|------------------------------------|----------------------|-----------------------------------------|----------------------------|---------------------------------------|-------------------------|---------------------------------------|----------------------|
|                  |                  | Encounter                          |                      | GERD N                                  | Rate (95% CI)              | BE N                                  | Rate (95% CI)           | EC N                                  | Rate (95% CI)        |
|                  |                  | N                                  | Rate (95% CI)        |                                         |                            |                                       |                         |                                       |                      |
| Overall          | 167,185          | 81,392,956                         | 121.0 (120.3, 121.7) | 18,508                                  | 10212.0 (9,823.5, 10600.6) | 2,489                                 | 725.5 (670.3, 780.8)    | 555                                   | 118.6 (105.3, 131.9) |
| Years            |                  |                                    |                      |                                         |                            |                                       |                         |                                       |                      |
| 2001-2002        | 22,143           | 8,892,780                          | 137.7 (135.4, 140.0) | 2,379                                   | 11940.2 (10537.9, 13342.5) | 673                                   | 1531.6 (1305.9, 1757.2) | 60                                    | 90.3 (61.2, 119.5)   |
| 2003-2004        | 24,727           | 7,923,607                          | 163.0 (160.3, 165.7) | 2,699                                   | 13320.8 (10801.9, 15839.7) | 572                                   | 1766.7 (964.2, 2569.1)  | 88                                    | 103.9 (74.9, 132.9)  |
| 2005-2006        | 28,956           | 10,090,055                         | 153.9 (151.6, 156.3) | 4,317                                   | 14829.3 (13305.2, 16353.4) | 375                                   | 618.2 (524.7, 711.6)    | 69                                    | 73.9 (48.6, 99.1)    |
| 2007-2008        | 41,641           | 16,535,982                         | 153.3 (151.5, 155.2) | 4,664                                   | 10654.5 (9849.3, 11459.6)  | 481                                   | 549.2 (472.5, 626.0)    | 184                                   | 169.7 (135.7, 203.7) |
| 2009-2010        | 49,718           | 37,950,532                         | 84.5 (83.6, 85.4)    | 4,449                                   | 7307.3 (6829.6, 7785.0)    | 388                                   | 317.0 (275.8, 358.2)    | 154                                   | 117.9 (95.2, 140.5)  |
| Sex              |                  |                                    |                      |                                         |                            |                                       |                         |                                       |                      |
| Male             | 74,152           | 31,423,289                         | 140.8 (139.5, 142.2) | 7,154                                   | 9884.4 (9310.2, 10458.6)   | 1,569                                 | 1063.9 (961.1, 1166.6)  | 437                                   | 215.9 (185.9, 245.8) |
| Female           | 93,033           | 49,969,667                         | 109.5 (108.6, 110.4) | 11,354                                  | 10553.3 (9999.2, 11107.4)  | 920                                   | 470.2 (413.0, 527.4)    | 118                                   | 37.7 (28.1, 47.2)    |
| Age              |                  |                                    |                      |                                         |                            |                                       |                         |                                       |                      |
| 0-9              | 1,755            | 7,651,027                          | 22.9 (21.9, 24.0)    | 140                                     | 7977.2 (6655.8, 9298.6)    | 1                                     | 57.0 (-54.7, 168.7)     | 0                                     | -                    |
| 10-19            | 2,549            | 6,103,494                          | 41.8 (40.1, 43.4)    | 219                                     | 8591.6 (7453.7, 9729.5)    | 4                                     | 156.9 (3.1, 310.7)      | 0                                     | -                    |
| 20-29            | 6,802            | 8,150,478                          | 83.5 (81.5, 85.4)    | 611                                     | 8982.7 (8270.4, 9694.9)    | 29                                    | 426.3 (271.2, 581.5)    | 1                                     | 14.7 (-14.1, 43.5)   |
| 30-39            | 11,681           | 8,576,937                          | 136.2 (133.7, 138.7) | 1,434                                   | 12276.3 (11640.9, 12911.8) | 93                                    | 796.2 (634.4, 958.0)    | 10                                    | 85.6 (32.5, 138.7)   |
| 40-49            | 21,404           | 11,292,051                         | 189.5 (187.0, 192.1) | 2,887                                   | 13488.1 (12996.1, 13980.2) | 318                                   | 1485.7 (1322.4, 1649.0) | 30                                    | 140.2 (90.0, 190.3)  |
| 50-59            | 30,389           | 12,748,553                         | 238.4 (235.7, 241.1) | 3,982                                   | 13103.4 (12696.4, 13510.4) | 502                                   | 1651.9 (1507.4, 1796.4) | 121                                   | 398.2 (327.2, 469.1) |
| 60-69            | 30,520           | 10,949,149                         | 278.7 (275.6, 281.9) | 3,582                                   | 11736.6 (11352.2, 12120.9) | 547                                   | 1792.3 (1642.1, 1942.5) | 164                                   | 537.4 (455.1, 619.6) |
| 70-79            | 32,755           | 9,211,490                          | 355.6 (351.7, 359.4) | 3,270                                   | 9983.2 (9641.0, 10325.4)   | 603                                   | 1840.9 (1694.0, 1987.9) | 137                                   | 418.3 (348.2, 488.3) |
| 80+              | 29,330           | 6,709,777                          | 437.1 (432.1, 442.1) | 2,383                                   | 8124.8 (7798.6, 8451.0)    | 392                                   | 1336.5 (1204.2, 1468.8) | 92                                    | 313.7 (249.6, 377.8) |
| Race             |                  |                                    |                      |                                         |                            |                                       |                         |                                       |                      |
| Caucasian        | 139,755          | 63,582,557                         | 124.9 (124.0, 125.8) | 15,741                                  | 10887.0 (10380.7, 11393.4) | 2,340                                 | 821.3 (751.8, 890.9)    | 463                                   | 116.5 (101.4, 131.6) |
| African-American | 18,472           | 11,554,043                         | 113.3 (111.6, 115.1) | 1,940                                   | 9094.4 (8264.5, 9924.3)    | 77                                    | 210.6 (156.1, 265.1)    | 76                                    | 150.7 (111.8, 189.6) |
| Other            | 8,958            | 6,256,356                          | 114.6 (112.2, 117.1) | 827                                     | 7601.1 (6690.0, 8512.1)    | 72                                    | 509.1 (298.4, 719.7)    | 16                                    | 80.0 (37.2, 122.9)   |

\*only for individuals with endoscopy during admit and discharge dates

**Supplementary Table 2.** Age-adjusted rates of esophagitis, Cerner Health Facts® Database, 2001–2010.

|                  | Esophagitis diagnosis/<br>100,000 encounters |                |                      | Esophagitis diagnosis*/<br>100,000 endoscopies |                  |                           |
|------------------|----------------------------------------------|----------------|----------------------|------------------------------------------------|------------------|---------------------------|
|                  | Esophagitis<br>N                             | Encounter<br>N | Rate (95% CI)        | Esophagitis<br>N                               | Endoscopies<br>N | Rate (95% CI)             |
| Overall          | 100,522                                      | 81,392,956     | 95.2 (94.5, 96.0)    | 9,987                                          | 167,185          | 5959.6 (5671.9, 6247.3)   |
| Years            |                                              |                |                      |                                                |                  |                           |
| 2001-2002        | 13,005                                       | 8,892,780      | 100.6 (98.5, 102.7)  | 2,032                                          | 22,143           | 9283.3 (8173.3, 10393.3)  |
| 2003-2004        | 14,945                                       | 7,923,607      | 134.0 (131.2, 136.8) | 2,089                                          | 24,727           | 11010.8 (8835.2, 13186.5) |
| 2005-2006        | 17,987                                       | 10,090,055     | 131.4 (128.9, 133.8) | 2,126                                          | 28,956           | 8989.7 (8023.6, 9955.9)   |
| 2007-2008        | 22,151                                       | 16,535,982     | 111.0 (109.2, 112.9) | 1,969                                          | 41,641           | 5094.3 (4510.8, 5677.7)   |
| 2009-2010        | 32,434                                       | 37,950,532     | 69.1 (68.2, 70.1)    | 1,771                                          | 49,718           | 3048.5 (2743.1, 3353.8)   |
| Sex              |                                              |                |                      |                                                |                  |                           |
| Male             | 42,924                                       | 31,423,289     | 115.8 (114.4, 117.1) | 4,795                                          | 74,152           | 7322.8 (6828.4, 7817.1)   |
| Female           | 49,580                                       | 49,969,667     | 71.5 (70.7, 72.3)    | 5,192                                          | 93,033           | 5097.0 (4737.4, 5456.6)   |
| Age              |                                              |                |                      |                                                |                  |                           |
| 0-9              | 2,961                                        | 7,651,027      | 38.7 (37.3, 40.1)    | 45                                             | 1,755            | 2564.1 (1814.9, 3313.3)   |
| 10-19            | 4,519                                        | 6,103,494      | 74.0 (71.9, 76.2)    | 211                                            | 2,549            | 8277.8 (7160.8, 9394.7)   |
| 20-29            | 5,201                                        | 8,150,478      | 63.8 (62.1, 65.5)    | 415                                            | 6,802            | 6101.1 (5514.1, 6688.2)   |
| 30-39            | 9,775                                        | 8,576,937      | 114.0 (111.7, 116.2) | 848                                            | 11,681           | 7259.7 (6771.0, 7748.3)   |
| 40-49            | 16,814                                       | 11,292,051     | 148.9 (146.7, 151.2) | 1,529                                          | 21,404           | 7143.5 (6785.5, 7501.6)   |
| 50-59            | 20,702                                       | 12,748,553     | 162.4 (160.2, 164.6) | 1,971                                          | 30,389           | 6485.9 (6199.6, 6772.2)   |
| 60-69            | 17,417                                       | 10,949,149     | 159.1 (156.7, 161.4) | 1,791                                          | 30,520           | 5868.3 (5596.5, 6140.1)   |
| 70-79            | 13,794                                       | 9,211,490      | 149.7 (147.2, 152.2) | 1,706                                          | 32,755           | 5208.4 (4961.2, 5455.5)   |
| 80+              | 9,339                                        | 6,709,777      | 139.2 (136.4, 142.0) | 1,471                                          | 29,330           | 5015.3 (4759.0, 5271.6)   |
| Race             |                                              |                |                      |                                                |                  |                           |
| Caucasian        | 78,656                                       | 63,582,557     | 96.6 (95.6, 97.5)    | 8,591                                          | 139,755          | 6430.4 (6075.9, 6784.9)   |
| African-American | 8,424                                        | 11,554,043     | 58.3 (56.9, 59.6)    | 1,005                                          | 18,472           | 4563.7 (3964.6, 5162.8)   |
| Other            | 5,424                                        | 6,256,356      | 75.0 (73.0, 77.1)    | 391                                            | 8,958            | 3757.4 (3084.2, 4430.5)   |

\*only for individuals with endoscopy during admit and discharge dates

**Supplementary Table 3.** Age-adjusted rates of reflux esophagitis, Cerner Health Facts® Database, 2001–2010.

|                  | Reflux esophagitis diagnosis/<br>100,000 encounters |                |                   | Reflux esophagitis diagnosis*/<br>100,000 endoscopies |                  |                         |
|------------------|-----------------------------------------------------|----------------|-------------------|-------------------------------------------------------|------------------|-------------------------|
|                  | Reflux<br>Esophagitis<br>N                          | Encounter<br>N | Rate              | Reflux<br>Esophagitis<br>N                            | Endoscopies<br>N | Rate                    |
| Overall          | 38,623                                              | 81,392,956     | 35.6 (35.2, 36.0) | 2,659                                                 | 167,185          | 1601.8 (1457.9, 1745.7) |
| Years            |                                                     |                |                   |                                                       |                  |                         |
| 2001-2002        | 5,099                                               | 8,892,780      | 41.4 (40.0, 42.8) | 528                                                   | 22,143           | 2289.8 (1726.0, 2853.7) |
| 2003-2004        | 5,408                                               | 7,923,607      | 50.5 (48.8, 52.2) | 496                                                   | 24,727           | 3002.8 (1845.4, 4160.2) |
| 2005-2006        | 6,438                                               | 10,090,055     | 48.7 (47.2, 50.2) | 459                                                   | 28,956           | 2230.3 (1715.4, 2745.2) |
| 2007-2008        | 8,507                                               | 16,535,982     | 40.9 (39.8, 42.0) | 545                                                   | 41,641           | 1187.4 (942.0, 1432.7)  |
| 2009-2010        | 13,171                                              | 37,950,532     | 25.5 (25.0, 26.1) | 631                                                   | 49,718           | 1120.4 (952.6, 1288.2)  |
| Sex              |                                                     |                |                   |                                                       |                  |                         |
| Male             | 15,103                                              | 31,423,289     | 40.1 (39.3, 40.9) | 1,221                                                 | 74,152           | 1888.3 (1641.2, 2135.3) |
| Female           | 19,350                                              | 49,969,667     | 27.4 (26.9, 27.8) | 1,438                                                 | 93,033           | 1412.1 (1238.1, 1586.0) |
| Age              |                                                     |                |                   |                                                       |                  |                         |
| 0-9              | 1,033                                               | 7,651,027      | 13.5 (12.7, 14.3) | 11                                                    | 1,755            | 626.8 (256.4, 997.2)    |
| 10-19            | 1,198                                               | 6,103,494      | 19.6 (18.5, 20.7) | 52                                                    | 2,549            | 2040.0 (1485.5, 2594.5) |
| 20-29            | 2,027                                               | 8,150,478      | 24.9 (23.8, 26.0) | 104                                                   | 6,802            | 1529.0 (1235.1, 1822.8) |
| 30-39            | 3,943                                               | 8,576,937      | 46.0 (44.5, 47.4) | 254                                                   | 11,681           | 2174.5 (1907.1, 2441.9) |
| 40-49            | 6,778                                               | 11,292,051     | 60.0 (58.6, 61.5) | 461                                                   | 21,404           | 2153.8 (1957.2, 2350.4) |
| 50-59            | 8,185                                               | 12,748,553     | 64.2 (62.8, 65.6) | 569                                                   | 30,389           | 1872.4 (1718.5, 2026.2) |
| 60-69            | 6,921                                               | 10,949,149     | 63.2 (61.7, 64.7) | 514                                                   | 30,520           | 1684.1 (1538.5, 1829.7) |
| 70-79            | 5,222                                               | 9,211,490      | 56.7 (55.2, 58.2) | 393                                                   | 32,755           | 1199.8 (1081.2, 1318.4) |
| 80+              | 3,316                                               | 6,709,777      | 49.4 (47.7, 51.1) | 301                                                   | 29,330           | 1026.3 (910.3, 1142.2)  |
| Race             |                                                     |                |                   |                                                       |                  |                         |
| Caucasian        | 29,155                                              | 63,582,557     | 34.1 (33.6, 34.7) | 2,295                                                 | 139,755          | 1698.7 (1526.1, 1871.3) |
| African-American | 3,046                                               | 11,554,043     | 20.9 (20.1, 21.7) | 277                                                   | 18,472           | 1319.1 (990.7, 1647.5)  |
| Other            | 2,252                                               | 6,256,356      | 31.0 (29.6, 32.3) | 87                                                    | 8,958            | 1032.8 (640.9, 1424.7)  |

\*only for individuals with endoscopy during admit and discharge dates

**Supplementary Figure 1.** Temporal trends of esophagitis (A) and reflux esophagitis (B) by age, Cerner Health Facts® Database, 2001–2010.

**Supplementary Figure 2.** Age-adjusted male-to-female incidence rate ratios by year for gastroesophageal reflux, Barrett's esophagus and esophageal cancer, Cerner Health Facts® Database, 2001–2010.

**Supplementary Table 4.** Age-adjusted rates of Barrett's esophagus per 100,000 encounters, restricted to those with concurrent endoscopy, Cerner Health Facts® Database, 2001–2010.

|                  | Barrett's esophagus*/<br>100,000 encounters |                 |                    |
|------------------|---------------------------------------------|-----------------|--------------------|
|                  | BE N                                        | Encounters<br>N | Rate (95% CI)      |
| Overall          | 2,489                                       | 81,392,956      | 1.5 (1.4, 1.6)     |
| Years            |                                             |                 |                    |
| 2001-2002        | 673                                         | 8,892,780       | 3.6 (3.3, 3.9)     |
| 2003-2004        | 572                                         | 7,923,607       | 3.6 (3.2, 3.9)     |
| 2005-2006        | 375                                         | 10,090,055      | 1.8 (1.6, 2.0)     |
| 2007-2008        | 481                                         | 16,535,982      | 1.4 (1.3, 1.6)     |
| 2009-2010        | 388                                         | 37,950,532      | 0.5 (0.4, 0.6)     |
| Sex              |                                             |                 |                    |
| Male             | 1,569                                       | 31,423,289      | 2.6 (2.4, 2.7)     |
| Female           | 920                                         | 49,969,667      | 0.9 (0.8, 0.9)     |
| Age              |                                             |                 |                    |
| 0-9              | 1                                           | 7,651,027       | 0.01 (-0.01, 0.04) |
| 10-19            | 4                                           | 6,103,494       | 0.1 (0.0, 0.1)     |
| 20-29            | 29                                          | 8,150,478       | 0.4 (0.2, 0.5)     |
| 30-39            | 93                                          | 8,576,937       | 1.1 (0.9, 1.3)     |
| 40-49            | 318                                         | 11,292,051      | 2.8 (2.5, 3.1)     |
| 50-59            | 502                                         | 12,748,553      | 3.9 (3.6, 4.3)     |
| 60-69            | 547                                         | 10,949,149      | 5.0 (4.6, 5.4)     |
| 70-79            | 603                                         | 9,211,490       | 6.5 (6.0, 7.1)     |
| 80+              | 392                                         | 6,709,777       | 5.8 (5.3, 6.4)     |
| Race             |                                             |                 |                    |
| Caucasian        | 2,340                                       | 63,582,557      | 1.7 (1.6, 1.8)     |
| African-American | 77                                          | 11,554,043      | 0.4 (0.3, 0.6)     |
| Other            | 72                                          | 6,256,356       | 0.9 (0.7, 1.1)     |

\*only for individuals with endoscopy during admit and discharge dates

**Supplementary Table 5.** Average Age-Adjusted Rates for Individuals with Two or More Diagnoses Codes, CERNER Database, 2001-2010.

|                  | Encounter<br>N | BE diagnosis/<br>100,000 encounters |                | EC diagnosis/<br>100,000 encounters |                 |
|------------------|----------------|-------------------------------------|----------------|-------------------------------------|-----------------|
|                  |                | BE N                                | Rate (95% CI)  | EC N                                | Rate (95% CI)   |
| Overall          | 81,392,956     | 3,405                               | 2.2 (2.1, 2.2) | 3,324                               | 1.9 (1.8, 2.0)  |
| Years            |                |                                     |                |                                     |                 |
| 2001-2002        | 8,892,780      | 620                                 | 3.7 (3.4, 4.0) | 289                                 | 1.4 (1.3, 1.6)  |
| 2003-2004        | 7,923,607      | 485                                 | 3.0 (2.7, 3.3) | 373                                 | 2.0 (1.8, 2.2)  |
| 2005-2006        | 10,090,055     | 603                                 | 3.1 (2.8, 3.4) | 537                                 | 2.4 (2.1, 2.6)  |
| 2007-2008        | 16,535,982     | 1,026                               | 3.1 (2.9, 3.3) | 907                                 | 2.5 (2.3, 2.7)  |
| 2009-2010        | 37,950,532     | 671                                 | 0.9 (0.8, 1.0) | 1,218                               | 1.5 (1.4, 1.6)  |
| Sex              |                |                                     |                |                                     |                 |
| Male             | 31,423,289     | 2,169                               | 3.6 (3.4, 3.8) | 2,540                               | 3.7 (3.5, 3.8)  |
| Female           | 49,969,667     | 1,173                               | 1.2 (1.1, 1.3) | 592                                 | 0.5 (0.5, 0.6)  |
| Age              |                |                                     |                |                                     |                 |
| 0-9              | 7,651,027      | 1                                   | 0.0 (0.0, 0.0) | 0                                   | -               |
| 10-19            | 6,103,494      | 11                                  | 0.2 (0.1, 0.3) | 1                                   | 0.0 (0.0, 0.0)  |
| 20-29            | 8,150,478      | 17                                  | 0.2 (0.1, 0.3) | 3                                   | 0.0 (0.0, 0.1)  |
| 30-39            | 8,576,937      | 148                                 | 1.7 (1.4, 2.0) | 48                                  | 0.6 (0.4, 0.7)  |
| 40-49            | 11,292,051     | 418                                 | 3.7 (3.3, 4.1) | 236                                 | 2.1 (1.8, 2.4)  |
| 50-59            | 12,748,553     | 812                                 | 6.4 (5.9, 6.8) | 745                                 | 5.8 (5.4, 6.3)  |
| 60-69            | 10,949,149     | 861                                 | 7.9 (7.3, 8.4) | 1,083                               | 9.9 (9.3, 10.5) |
| 70-79            | 9,211,490      | 791                                 | 8.6 (8.0, 9.2) | 874                                 | 9.5 (8.9, 10.1) |
| 80+              | 6,709,777      | 346                                 | 5.2 (4.6, 5.7) | 334                                 | 5.0 (4.4, 5.5)  |
| Race             |                |                                     |                |                                     |                 |
| Caucasian        | 63,582,557     | 3,216                               | 2.5 (2.4, 2.6) | 2,757                               | 1.9 (1.8, 1.9)  |
| African-American | 11,554,043     | 71                                  | 0.4 (0.3, 0.5) | 287                                 | 1.6 (1.4, 1.7)  |
| Other            | 6,256,356      | 55                                  | 0.7 (0.5, 0.9) | 88                                  | 1.0 (0.8, 1.3)  |

**Supplementary Table 6.** Average Age-Adjusted Rates per 100,000 person-years, CERNER Database, 2001-2010.

|                  | Person-years* | GERD diagnosis <sup>†</sup> /<br>100,000 person-years* |                         | BE diagnosis <sup>‡</sup> /<br>100,000 person-years* |                      | EC diagnosis <sup>‡</sup> /<br>100,000 person-years* |                   |
|------------------|---------------|--------------------------------------------------------|-------------------------|------------------------------------------------------|----------------------|------------------------------------------------------|-------------------|
|                  |               | GERD<br>N                                              | Rate (95% CI)           | BE N                                                 | Rate (95% CI)        | EC N                                                 | Rate (95% CI)     |
| Overall          | 41,848,896    | 723,854                                                | 1218.4 (1215.0, 1221.9) | 32,325                                               | 43.1 (42.6, 43.7)    | 10,934                                               | 12.6 (12.3, 12.8) |
| Years            |               |                                                        |                         |                                                      |                      |                                                      |                   |
| 2001-2002        | 3,725,331     | 48,440                                                 | 894.8 (885.6, 903.9)    | 4,289                                                | 67.9 (65.7, 70.2)    | 623                                                  | 8.5 (7.8, 9.2)    |
| 2003-2004        | 4,062,135     | 63,897                                                 | 1049.5 (1039.4, 1059.6) | 4,604                                                | 63.6 (61.5, 65.6)    | 952                                                  | 10.5 (9.7, 11.2)  |
| 2005-2006        | 4,949,302     | 108,855                                                | 1474.8 (1464.0, 1485.7) | 5,162                                                | 59.6 (57.7, 61.4)    | 1,369                                                | 13.1 (12.3, 13.8) |
| 2007-2008        | 7,350,348     | 171,140                                                | 1690.2 (1680.6, 1699.7) | 7,297                                                | 57.7 (56.2, 59.1)    | 2,158                                                | 14.9 (14.2, 15.6) |
| 2009-2010        | 21,761,780    | 331,522                                                | 1088.4 (1083.8, 1093.0) | 10,973                                               | 26.7 (26.2, 27.3)    | 5,832                                                | 12.7 (12.4, 13.1) |
| Sex              |               |                                                        |                         |                                                      |                      |                                                      |                   |
| Male             | 16,552,380    | 258,042                                                | 1140.8 (1135.5, 1146.1) | 18,611                                               | 64.7 (63.6, 65.8)    | 7,899                                                | 23.0 (22.5, 23.6) |
| Female           | 25,296,516    | 404,060                                                | 1088.6 (1084.4, 1092.8) | 12,513                                               | 27.0 (26.5, 27.5)    | 2,054                                                | 3.7 (3.6, 3.9)    |
| Age              |               |                                                        |                         |                                                      |                      |                                                      |                   |
| 0-9              | 4,471,366     | 34,269                                                 | 766.4 (758.3, 774.5)    | 26                                                   | 0.6 (0.4, 0.8)       | 12                                                   | 0.3 (0.1, 0.4)    |
| 10-19            | 3,556,220     | 15,229                                                 | 428.2 (421.4, 435.0)    | 111                                                  | 3.1 (2.5, 3.7)       | 10                                                   | 0.3 (0.1, 0.5)    |
| 20-29            | 4,483,013     | 32,244                                                 | 719.2 (711.4, 727.1)    | 471                                                  | 10.5 (9.6, 11.5)     | 22                                                   | 0.5 (0.3, 0.7)    |
| 30-39            | 4,614,962     | 58,420                                                 | 1265.9 (1255.6, 1276.1) | 1,577                                                | 34.2 (32.5, 35.9)    | 150                                                  | 3.3 (2.7, 3.8)    |
| 40-49            | 5,962,544     | 106,688                                                | 1789.3 (1778.6, 1800.0) | 4,571                                                | 76.7 (74.4, 78.9)    | 777                                                  | 13.0 (12.1, 13.9) |
| 50-59            | 6,391,828     | 142,775                                                | 2233.7 (2222.1, 2245.3) | 7,986                                                | 125.0 (122.2, 127.7) | 2,414                                                | 37.8 (36.3, 39.3) |
| 60-69            | 5,237,113     | 133,908                                                | 2556.9 (2543.2, 2570.6) | 7,823                                                | 149.4 (146.1, 152.7) | 3,378                                                | 64.5 (62.3, 66.7) |
| 70-79            | 4,118,278     | 112,357                                                | 2728.3 (2712.3, 2744.2) | 6,345                                                | 154.1 (150.3, 157.9) | 2,890                                                | 70.2 (67.6, 72.7) |
| 80+              | 3,013,572     | 87,964                                                 | 2918.9 (2899.6, 2938.2) | 3,415                                                | 113.3 (109.5, 117.1) | 1,281                                                | 42.5 (40.2, 44.8) |
| Race             |               |                                                        |                         |                                                      |                      |                                                      |                   |
| Caucasian        | 32,316,331    | 547,999                                                | 1149.6 (1145.6, 1153.5) | 29,367                                               | 48.1 (47.5, 48.8)    | 8,624                                                | 11.8 (11.5, 12.1) |
| African-American | 5,935,836     | 84,453                                                 | 1175.1 (1166.8, 1183.4) | 832                                                  | 10.3 (9.6, 11.0)     | 992                                                  | 11.7 (11.0, 12.4) |
| Other            | 3,596,729     | 29,650                                                 | 716.0 (707.5, 724.4)    | 925                                                  | 20.5 (19.1, 21.9)    | 337                                                  | 6.9 (6.2, 7.7)    |

\*Person-year is defined as one encounter per individual per year.

<sup>†</sup>Individuals remain continuously at risk for GERD, with up to one diagnosis per year.

<sup>‡</sup>BE and EC are considered incident cases at the first diagnosis, and individuals are removed from the risk set after diagnosis.



**Supplementary Table 7.** Average Age-Adjusted Rates for Hospitals that Contributed Data Yearly, CERNER Database, 2001-2010.

|                  | Encounter<br>N | GERD diagnosis/<br>100,000 encounters |                         | BE diagnosis/<br>100,000 encounters |                   | EC diagnosis/<br>100,000 encounters |                   |
|------------------|----------------|---------------------------------------|-------------------------|-------------------------------------|-------------------|-------------------------------------|-------------------|
|                  |                | GERD N                                | Rate (95% CI)           | BE N                                | Rate (95% CI)     | EC N                                | Rate (95% CI)     |
| Overall          | 38,879,405     | 354,730                               | 656.5 (653.8, 659.3)    | 18,602                              | 26.3 (25.9, 26.7) | 6,040                               | 7.2 (7.0, 7.4)    |
| Years            |                |                                       |                         |                                     |                   |                                     |                   |
| 2001-2002        | 3,453,756      | 23,019                                | 464.2 (456.4, 472.0)    | 2,176                               | 34.9 (33.2, 36.6) | 241                                 | 2.9 (2.5, 3.3)    |
| 2003-2004        | 3,946,166      | 33,637                                | 600.8 (591.9, 609.7)    | 2,647                               | 36.6 (34.9, 38.2) | 394                                 | 4.1 (3.6, 4.5)    |
| 2005-2006        | 5,918,795      | 60,635                                | 692.5 (685.3, 699.7)    | 3,315                               | 31.6 (30.3, 32.8) | 711                                 | 5.6 (5.1, 6.0)    |
| 2007-2008        | 9,712,315      | 96,715                                | 760.3 (754.3, 766.4)    | 4,891                               | 28.6 (27.7, 29.6) | 1,500                               | 7.2 (6.8, 7.6)    |
| 2009-2010        | 15,848,373     | 140,724                               | 633.0 (628.9, 637.2)    | 5,573                               | 18.3 (17.8, 18.9) | 3,194                               | 9.5 (9.2, 9.9)    |
| Sex              |                |                                       |                         |                                     |                   |                                     |                   |
| Male             | 15,087,298     | 140,592                               | 709.3 (704.6, 714.1)    | 11,128                              | 41.6 (40.7, 42.6) | 4,809                               | 14.4 (13.9, 14.9) |
| Female           | 23,792,107     | 214,138                               | 632.8 (629.3, 636.4)    | 7,474                               | 17.3 (16.8, 17.7) | 1,231                               | 2.4 (2.2, 2.5)    |
| Age              |                |                                       |                         |                                     |                   |                                     |                   |
| 0-9              | 3,737,441      | 16,955                                | 453.7 (446.8, 460.5)    | 9                                   | 0.2 (0.1, 0.4)    | 9                                   | 0.2 (0.1, 0.4)    |
| 10-19            | 2,897,083      | 8,193                                 | 282.8 (276.7, 288.9)    | 70                                  | 2.4 (1.9, 3.0)    | 5                                   | 0.2 (0.0, 0.3)    |
| 20-29            | 3,896,475      | 15,946                                | 409.2 (402.9, 415.6)    | 283                                 | 7.3 (6.4, 8.1)    | 12                                  | 0.3 (0.1, 0.5)    |
| 30-39            | 3,961,043      | 27,880                                | 703.9 (695.6, 712.1)    | 971                                 | 24.5 (23.0, 26.1) | 88                                  | 2.2 (1.8, 2.7)    |
| 40-49            | 5,405,781      | 52,502                                | 971.2 (962.9, 979.5)    | 2,775                               | 51.3 (49.4, 53.3) | 492                                 | 9.1 (8.3, 9.9)    |
| 50-59            | 6,250,231      | 69,785                                | 1116.5 (1108.2, 1124.8) | 4,596                               | 73.6 (71.4, 75.7) | 1,389                               | 22.2 (21.1, 23.4) |
| 60-69            | 5,318,470      | 66,104                                | 1242.9 (1233.4, 1252.4) | 4,431                               | 83.4 (80.9, 85.8) | 1,865                               | 35.1 (33.5, 36.7) |
| 70-79            | 4,403,012      | 55,842                                | 1268.3 (1257.7, 1278.8) | 3,667                               | 83.3 (80.6, 86.0) | 1,495                               | 34.0 (32.2, 35.7) |
| 80+              | 3,009,869      | 41,523                                | 1379.6 (1366.3, 1392.8) | 1,800                               | 59.8 (57.1, 62.6) | 685                                 | 22.8 (21.1, 24.5) |
| Race             |                |                                       |                         |                                     |                   |                                     |                   |
| Caucasian        | 30,711,436     | 298,688                               | 695.2 (691.8, 698.6)    | 17,552                              | 30.6 (30.1, 31.2) | 5,315                               | 7.5 (7.3, 7.8)    |
| African-American | 5,727,316      | 41,177                                | 566.7 (560.8, 572.7)    | 584                                 | 6.6 (6.1, 7.2)    | 513                                 | 5.4 (4.9, 5.9)    |
| Other            | 2,440,653      | 14,865                                | 520.4 (511.6, 529.2)    | 466                                 | 14.4 (13.1, 15.8) | 212                                 | 5.9 (5.1, 6.7)    |

### A) Esophagitis Rates

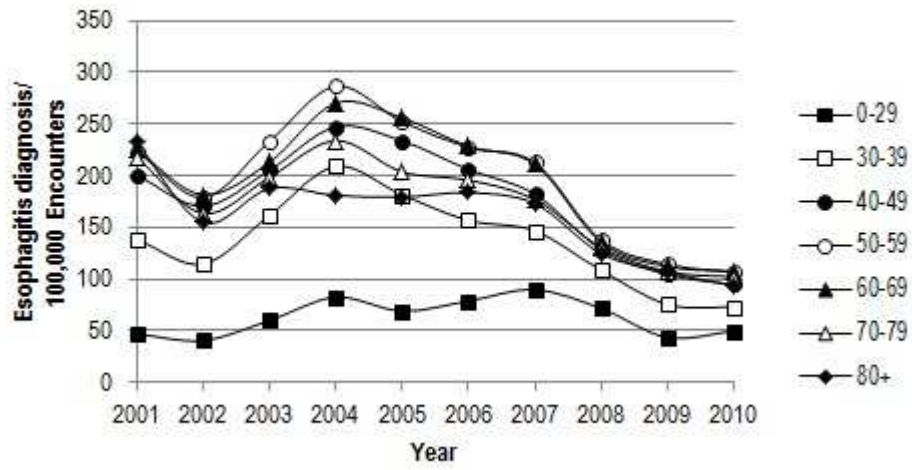

## B) Reflux Esophagitis Rates

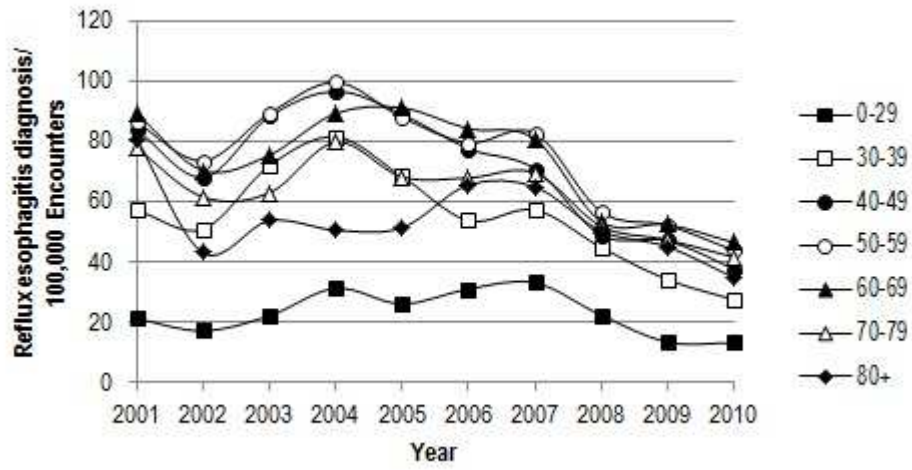

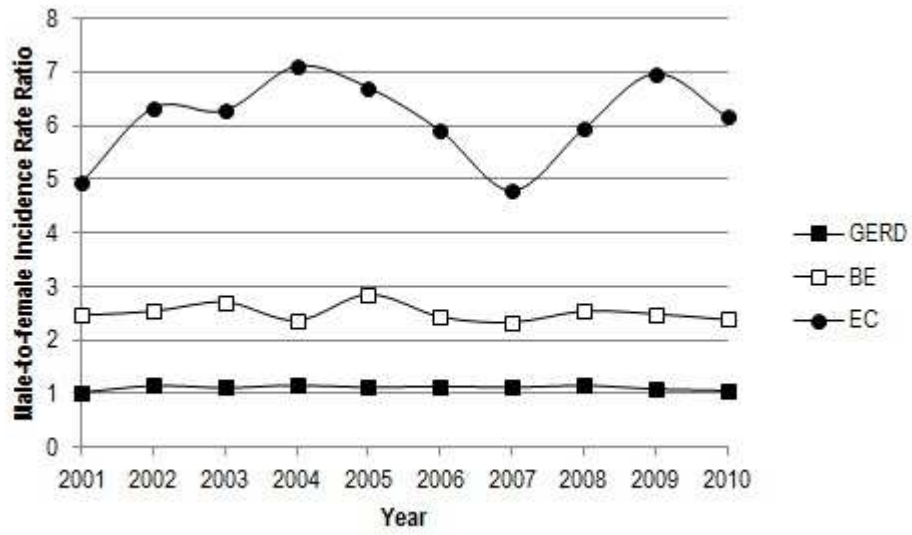

Supplement: NIHMS744984-supplement-01.pdf [file NIHMS744984-supplement-01.pdf]
